# Supplementary material
Source: publisher figshare collection journal article supplement (https://gsajournals.figshare.com/articles/dataset/_/14079962)
Supplement: Supplementary file 1 [file 2]

## Sheet: File_S3
File Description
This file contains the genotype and linkage map information of the F2 plants used for mapping. The 12th row numbers indicate the chromosome number in version 2 of the Finola assembly to which a marker belongs. The 13th row numbers indicate marker name and physical base pair position of the chromosome it belongs to (row 12). The 14th row numbers indicate the linkage group that each marker was assi…
CHROM	1	1	1	1	1	1	1	1	1	1	1	1	1	1	1	1	1	1	1	1	1	1	1	1	1	1	1	1	1	1	1	1	1	1	1	1	1	1	1	1	1	1	1	1	1	1	1	1	1
Marker	100394975	100518123	100294723	100336925	623921	730085	816758	1955291	2334578	2554340	70747254	7634771	6218437	6241462	89337362	89931481	69242529	23405933	25755406	36699950	69184746	65812367	69177298	23888745	36838833	8157828	96134486	68025574	25473972	36837238	39491756	95963551	23890769	23489937	11649446	92011922	34207659	12381537	11631756	36837460	36837472	59458950	23405548	11633610	11633416	12013280	12017465	11970214	12382365
LG	1	1	1	1	1	1	1	1	1	1	1	1	1	1	1	1	1	1	1	1	1	1	1	1	1	1	1	1	1	1	1	1	1	1	1	1	1	1	1	1	1	1	1	1	1	1	1	1	1
CM	0	1.44	3.056	4.939	14.98	18.779	21.542	26.105	30.913	35.013	43.337	45.155	45.624	45.891	46.564	46.868	47.195	47.468	47.818	48.005	48.785	48.845	48.93	49.058	49.095	49.524	49.761	50.054	50.18	50.4	50.691	50.924	51.111	51.362	51.592	51.934	52.291	52.324	52.375	52.503	52.596	52.977	53.089	53.397	53.559	53.724	53.862	54.004	54.172
UC-100	h	h	a	-	h	b	h	h	h	a	a	a	a	a	a	a	a	a	a	a	a	a	a	h	a	a	a	a	a	a	a	a	a	a	a	a	a	a	a	a	a	h	a	a	a	a	a	a	a
UC-101	b	b	b	b	b	-	b	b	b	b	h	b	b	h	b	h	h	h	a	h	h	h	h	a	h	h	h	h	h	h	a	h	h	h	h	h	h	h	h	h	h	h	h	h	h	-	h	h	h
UC-102	a	h	h	a	b	b	b	h	b	b	b	b	b	b	b	b	b	b	b	b	b	b	b	b	b	b	b	b	b	b	b	b	b	h	b	b	b	-	b	b	b	b	b	b	b	b	b	b	h
UC-103	h	h	h	h	h	h	h	h	h	a	h	a	a	a	a	a	a	a	a	a	a	a	a	a	a	a	a	a	a	a	a	a	a	a	a	a	a	a	a	a	a	a	a	a	a	a	a	a	a
UC-104	a	a	a	a	a	a	a	-	a	a	a	a	a	a	h	a	-	h	h	h	h	h	h	h	a	h	h	h	b	h	h	h	h	h	-	h	h	h	h	h	h	h	h	h	b	h	-	h	h
UC-105	a	a	a	h	h	a	a	b	h	h	h	h	a	h	b	b	h	h	h	h	h	h	h	h	h	h	h	h	h	h	h	h	h	a	h	a	h	h	h	h	h	h	h	h	h	a	h	h	h
UC-106	b	b	b	b	b	b	b	h	h	h	b	h	h	h	h	h	h	b	a	h	h	b	h	h	h	a	h	h	h	h	b	h	b	h	h	h	h	h	a	h	h	h	h	h	h	h	h	h	h
UC-107	a	a	a	a	a	a	a	a	a	a	a	a	a	a	a	a	a	a	a	a	a	a	a	a	a	a	a	a	a	a	a	a	a	a	a	a	a	a	a	a	a	a	a	a	a	a	a	a	a
UC-108	a	a	a	a	h	h	h	b	b	b	h	-	b	b	h	h	b	b	b	b	b	b	b	b	b	b	b	b	b	b	b	b	b	b	b	b	b	b	b	b	b	b	b	b	b	b	b	b	b
UC-109	b	b	b	b	h	h	h	h	h	h	h	h	h	h	h	h	h	h	a	h	h	h	h	b	h	h	h	h	h	h	h	h	h	h	h	h	h	h	h	h	h	h	h	h	h	h	a	h	h
UC-10	h	h	h	h	b	b	b	b	b	b	h	b	b	b	h	h	h	b	b	b	h	b	h	b	b	b	b	h	b	h	b	b	b	b	h	h	h	a	h	b	b	b	b	h	h	h	-	h	b
UC-110	h	h	h	h	h	h	h	-	h	h	h	h	a	a	h	b	h	h	h	h	h	h	h	b	a	h	h	h	a	h	h	h	b	b	b	h	h	h	h	h	h	h	h	h	h	h	h	h	h
UC-111	h	h	h	h	h	h	h	h	a	h	h	h	b	h	h	h	h	h	h	h	h	h	h	h	h	h	h	b	b	h	h	h	h	h	h	h	h	h	h	h	h	h	h	h	h	h	h	h	h
UC-112	a	a	a	a	a	a	a	h	h	h	b	h	h	h	h	h	h	h	h	h	h	h	h	h	h	h	h	h	a	h	h	h	h	h	h	h	h	a	h	h	h	h	h	h	h	h	h	h	h
UC-113	h	h	h	h	h	h	h	h	h	h	b	h	h	h	h	h	h	a	h	h	a	h	h	h	h	h	h	h	h	h	h	b	b	h	b	h	h	h	b	h	h	h	h	b	b	b	b	b	h
UC-114	b	b	b	b	b	b	b	b	b	b	b	b	b	b	b	b	b	b	b	b	b	b	b	b	b	b	b	b	b	b	b	b	b	b	b	b	b	b	b	b	b	b	b	b	b	b	b	b	b
UC-115	h	h	h	h	h	h	h	a	h	b	h	h	h	h	b	h	h	h	h	h	h	h	h	h	h	h	h	h	h	h	h	h	h	h	h	h	a	h	h	h	h	h	h	h	h	h	h	h	h
UC-116	b	b	b	b	b	b	h	b	b	b	b	b	b	b	b	b	b	b	b	b	b	b	b	b	b	b	b	b	b	b	b	b	b	b	b	b	b	b	b	b	b	b	b	b	b	b	b	b	b
UC-118	h	h	h	h	h	b	b	a	a	a	a	a	a	a	a	a	a	a	a	a	a	a	a	a	a	a	a	a	a	a	a	a	a	a	a	a	a	a	a	a	a	a	a	a	a	a	a	a	a
UC-119	h	h	h	h	h	h	h	h	h	h	b	h	b	h	a	a	b	b	h	h	b	b	b	h	h	h	h	b	h	h	h	h	h	h	h	h	b	h	b	h	h	h	h	h	h	h	h	h	h
UC-11	b	b	b	b	h	a	h	a	b	h	a	h	h	h	h	b	h	h	h	h	h	h	h	h	h	h	h	h	h	h	h	h	a	b	b	a	h	h	h	h	h	h	h	h	h	h	h	h	h
UC-120	h	h	h	h	h	b	h	h	h	h	b	h	h	h	h	h	h	h	h	h	h	h	h	h	h	h	h	h	h	h	b	h	h	h	h	h	b	h	b	h	h	b	h	h	h	h	h	a	h
UC-121	h	h	h	h	h	h	b	a	b	h	h	-	h	h	h	h	h	h	h	a	h	h	h	h	h	h	h	h	h	h	b	h	h	b	h	h	h	h	h	h	h	h	h	h	h	h	h	h	h
UC-122	h	h	h	h	b	h	h	h	h	h	a	h	h	h	a	a	a	a	a	h	a	a	a	h	h	h	h	a	a	h	a	a	h	a	a	a	a	a	a	h	h	h	a	a	a	a	a	a	a
UC-123	b	b	b	b	b	b	a	a	a	a	a	a	a	a	a	a	a	a	a	a	a	a	a	a	a	a	a	a	a	a	a	a	a	a	a	h	a	a	a	a	a	a	a	a	a	a	a	a	a
UC-124	a	a	a	a	a	a	a	a	a	a	a	h	h	h	h	a	a	h	h	h	h	h	h	h	h	h	h	h	h	h	h	h	h	h	h	h	h	b	h	h	h	h	h	h	h	h	h	h	h
UC-125	h	h	h	h	h	b	h	b	b	b	h	h	a	h	h	h	h	h	h	h	h	h	h	h	h	h	h	h	h	h	h	h	h	h	h	h	h	h	h	h	h	h	h	h	h	h	h	h	h
UC-126	h	h	h	h	h	a	h	b	h	h	b	b	b	b	b	b	b	b	b	b	b	b	b	b	b	b	b	b	b	b	b	b	b	b	b	b	b	b	b	b	b	b	b	b	b	b	b	b	b
UC-127	h	h	h	h	h	h	h	h	h	h	b	b	b	b	b	b	b	h	b	b	b	b	b	b	b	b	b	b	b	b	b	b	b	b	b	b	b	b	b	b	b	b	b	b	b	b	b	b	b
UC-128	b	b	b	b	h	h	h	a	h	a	a	a	a	a	a	a	a	a	a	a	a	a	a	a	a	a	a	a	a	a	a	a	a	a	a	a	a	a	a	a	a	a	a	a	a	a	a	a	h
UC-129	a	a	a	a	a	a	a	a	a	a	h	h	h	h	h	h	h	h	h	h	h	h	h	h	h	h	h	h	h	h	h	h	h	h	h	h	h	h	h	h	h	h	h	h	h	h	h	h	h
UC-12	b	b	b	b	b	b	b	b	b	b	-	h	h	h	h	h	h	h	h	b	h	h	h	b	-	h	h	h	h	h	h	h	a	h	h	h	h	b	h	h	h	h	h	b	b	h	h	a	b
UC-130	h	h	h	h	a	h	h	h	h	h	h	h	h	h	h	h	h	h	h	h	h	h	h	h	h	h	h	h	h	h	b	h	h	h	h	h	h	h	h	h	h	h	h	h	h	h	h	h	a
UC-131	h	h	h	h	h	h	h	h	a	h	h	h	h	h	h	h	h	h	h	b	h	h	h	h	h	h	h	h	h	h	h	h	h	h	h	b	h	h	h	h	h	h	h	h	h	h	h	h	h
UC-132	h	h	h	h	h	h	h	h	h	h	h	h	h	h	h	h	h	h	a	h	h	h	a	h	h	h	h	h	h	h	h	h	h	h	h	h	h	h	h	h	h	h	h	h	h	h	h	h	h
UC-133	h	b	h	b	h	h	h	h	h	h	b	b	h	b	b	b	b	b	b	b	b	b	b	b	b	b	b	b	b	b	b	b	b	b	b	b	b	b	b	b	b	b	b	b	b	b	b	h	b
UC-134	h	h	h	h	h	a	h	h	h	h	h	h	h	h	h	h	h	h	h	b	h	h	h	h	h	h	h	h	h	h	h	h	h	h	h	h	h	h	h	h	h	h	h	h	h	h	h	h	h
UC-135	b	b	b	b	b	b	b	b	b	b	b	b	b	h	b	b	b	b	b	b	b	b	b	b	b	b	b	b	b	b	b	b	b	b	b	b	b	b	b	b	b	b	b	b	b	b	h	b	b
UC-136	h	h	h	h	h	h	h	h	h	h	b	b	b	b	b	b	b	b	b	b	b	b	b	b	b	b	b	b	b	b	b	b	b	b	b	b	b	b	b	b	b	b	b	b	b	b	b	b	b
UC-137	a	a	a	a	a	a	a	a	a	a	h	a	a	a	a	a	a	a	a	a	a	a	a	a	a	a	a	a	a	a	a	a	a	a	a	a	a	a	a	a	a	a	a	a	a	a	a	a	a
UC-139	h	h	h	h	h	h	h	h	h	h	b	h	h	h	b	b	b	b	b	b	b	h	b	b	b	h	b	b	b	b	b	b	b	b	h	b	h	b	b	b	b	b	b	b	b	b	b	b	b
UC-13	h	h	h	h	h	h	a	h	b	b	b	h	b	b	b	b	h	b	b	b	b	b	b	b	b	b	b	b	b	b	b	b	b	b	b	b	h	b	b	b	b	b	b	b	b	b	b	b	h
UC-140	h	h	h	h	a	h	h	h	b	b	h	h	h	h	h	h	h	h	b	h	h	h	h	h	h	h	h	h	h	b	h	h	h	h	h	h	h	h	h	h	h	h	h	a	h	h	h	h	h
UC-141	h	h	b	h	h	h	h	h	h	h	a	h	h	h	h	h	h	h	h	h	h	h	h	h	h	h	h	h	h	h	h	h	h	h	h	h	h	h	h	h	h	h	h	h	h	h	h	h	h
UC-143	h	h	h	h	h	h	h	b	b	b	b	b	b	b	b	b	b	b	b	b	b	b	b	b	b	b	b	b	b	b	b	b	b	b	b	b	b	b	b	b	b	b	b	b	b	b	b	b	b
UC-144	h	h	h	h	h	h	h	a	a	a	h	h	h	h	h	h	h	h	h	h	h	h	h	h	h	h	h	h	h	h	h	h	h	h	h	h	h	h	h	h	h	h	h	h	h	h	h	h	h
UC-145	b	b	b	b	b	h	b	b	b	b	h	b	b	b	b	b	h	b	b	b	h	b	h	b	b	b	b	b	b	b	b	b	b	b	h	b	b	b	b	b	b	b	b	b	h	b	b	b	b
UC-146	h	h	h	h	h	a	h	a	a	a	a	a	h	a	a	a	a	a	a	a	a	a	a	a	a	a	a	a	a	a	a	a	a	a	a	a	a	a	a	a	a	a	a	a	a	a	a	h	a
UC-147	b	b	b	b	b	h	h	h	h	h	a	h	h	h	a	h	a	h	h	h	a	a	a	h	h	h	h	a	a	h	h	h	h	h	h	h	h	h	h	h	h	h	h	b	h	h	h	h	h
UC-149	b	b	b	b	b	b	b	h	b	b	h	a	h	b	h	b	h	h	h	h	h	h	h	h	h	h	h	h	h	h	h	h	h	h	h	h	h	h	h	h	h	h	h	h	h	h	h	b	h
UC-14	b	b	b	b	b	b	b	-	b	b	b	b	b	b	b	b	b	h	b	b	b	b	b	b	b	b	b	b	b	b	b	b	b	b	b	b	b	b	b	b	b	b	b	b	b	b	b	b	b
UC-151	b	b	b	b	a	h	h	h	h	h	a	h	h	h	h	h	b	h	h	h	h	h	h	h	h	h	h	h	h	h	a	h	a	h	h	h	h	b	h	h	h	h	a	h	h	h	h	h	h
UC-152	h	h	h	h	h	h	h	a	h	h	a	h	h	h	a	a	a	a	a	h	a	a	a	a	h	h	a	a	a	h	a	a	a	a	a	a	h	a	-	h	h	a	a	a	a	a	a	a	a
UC-153	b	b	b	b	b	h	h	h	h	h	h	h	h	h	h	h	h	h	h	h	h	h	h	h	h	b	h	h	h	h	h	h	h	h	h	h	h	h	h	h	h	h	h	h	h	h	h	h	h
UC-154	h	h	h	h	b	b	b	b	b	b	h	h	h	h	h	b	h	h	h	-	h	h	h	h	h	h	h	h	h	h	h	h	h	h	h	h	h	h	h	b	h	h	h	h	h	h	h	h	h
UC-155	h	h	h	h	h	h	h	h	h	h	a	h	h	h	h	h	a	h	h	h	a	a	a	h	h	h	h	a	h	h	h	h	h	h	h	h	h	h	h	h	h	h	h	h	h	h	h	h	h
UC-156	h	h	h	h	h	b	b	b	b	b	b	b	b	b	b	b	b	b	b	b	b	b	b	b	b	b	b	b	b	b	b	b	b	b	b	b	b	b	b	b	b	b	b	b	b	b	b	b	b
UC-157	h	h	h	h	h	h	b	h	h	h	h	h	h	h	h	h	h	h	h	h	h	h	h	h	h	h	h	h	h	h	h	h	h	h	h	h	h	h	a	h	h	h	h	h	h	h	h	h	h
UC-158	h	h	h	h	h	a	a	a	a	a	a	a	a	a	a	a	a	a	a	a	a	a	a	a	a	a	a	a	a	a	a	a	a	a	h	a	a	a	a	a	a	a	a	a	a	a	a	a	a
UC-159	b	b	b	b	b	b	b	b	b	b	h	h	h	h	h	b	h	h	h	h	h	h	h	h	h	h	h	h	h	h	h	h	h	h	h	h	h	h	a	h	h	h	h	h	h	h	h	h	h
UC-15	a	a	h	h	b	h	h	a	h	h	h	-	h	h	b	b	a	h	a	a	h	b	h	h	h	h	a	h	h	h	h	b	h	h	h	a	h	a	h	h	h	h	h	-	h	h	h	h	h
UC-160	b	b	b	b	b	b	b	h	h	h	h	h	h	h	h	b	h	h	h	h	h	h	h	h	h	h	h	h	h	h	h	h	a	h	h	a	h	h	h	h	h	h	h	h	h	h	h	h	h
UC-161	h	h	h	h	h	h	h	a	h	h	b	b	b	b	b	b	b	b	b	b	b	b	b	b	b	b	b	b	b	b	b	b	b	b	b	b	b	b	b	b	b	b	b	b	b	b	h	b	b
UC-162	h	h	h	h	h	h	b	h	h	h	h	h	b	h	h	a	h	h	a	h	h	h	h	h	h	h	h	h	b	h	h	a	a	h	b	h	a	b	h	h	h	h	h	h	h	h	h	h	h
UC-163	h	h	h	h	h	h	h	h	h	h	h	h	h	h	h	h	h	h	h	h	h	h	b	h	h	h	h	h	a	h	b	h	h	h	h	h	h	h	h	h	h	h	h	h	h	h	h	h	h
UC-164	h	h	h	h	b	b	h	b	h	h	b	h	b	b	b	b	h	b	b	b	b	h	b	b	b	b	b	b	b	b	b	b	b	b	b	h	b	h	b	b	b	b	b	b	b	b	b	b	b
UC-165	b	b	b	b	h	h	h	a	h	a	a	a	a	a	h	-	h	a	h	h	a	h	a	a	a	a	a	h	a	a	a	a	a	a	a	a	a	a	h	a	a	a	a	h	a	a	a	a	h
UC-167	h	h	h	h	h	h	h	h	h	h	h	h	h	h	h	h	h	h	h	h	h	h	h	h	h	h	h	h	h	h	h	h	h	h	h	h	h	h	h	h	h	h	h	h	h	h	h	h	h
UC-168	b	b	b	b	b	b	b	h	b	b	b	h	b	h	b	b	b	b	h	b	b	b	b	b	b	b	b	b	b	b	b	b	b	h	b	b	b	b	b	b	b	b	b	b	b	b	b	b	b
UC-169	h	h	a	h	h	h	h	h	h	h	h	a	h	h	h	h	h	h	h	h	h	h	h	h	h	h	h	h	h	h	h	h	h	h	h	h	h	h	h	h	h	h	h	h	h	h	h	h	h
UC-16	b	b	b	b	b	b	b	b	b	b	a	a	a	a	a	a	a	a	a	a	a	a	a	a	a	a	a	a	a	a	a	a	a	a	a	a	a	a	a	a	a	a	a	a	a	a	a	a	a
UC-170	a	a	a	h	a	a	a	a	a	a	a	a	a	h	h	a	a	a	h	a	a	a	a	a	a	a	a	a	a	a	a	a	a	a	a	a	h	a	a	a	a	a	a	a	a	a	a	a	h
UC-171	b	b	b	b	b	b	b	b	b	b	h	b	h	b	h	b	h	b	b	b	h	h	h	b	b	b	b	h	b	h	b	b	b	b	b	b	b	b	b	b	b	b	b	b	h	b	b	b	b
UC-172	b	b	b	b	b	h	b	b	b	h	h	h	b	h	h	h	h	h	h	h	h	h	h	h	h	h	b	a	h	h	h	h	h	h	h	h	a	b	h	h	h	h	h	h	h	h	h	h	h
UC-173	h	h	h	h	b	b	b	b	b	b	a	h	h	h	a	h	h	h	h	h	h	h	h	h	h	h	h	h	h	h	a	h	h	b	h	h	h	h	h	h	h	h	h	h	h	h	h	h	h
UC-174	h	h	h	h	h	h	b	h	h	h	h	h	h	h	h	h	h	h	h	h	h	h	h	h	h	h	h	h	h	h	h	h	a	h	h	h	h	h	h	h	h	h	h	h	h	b	h	h	h
UC-176	h	h	h	h	h	h	h	a	h	h	h	h	h	h	h	h	h	h	h	h	h	h	h	h	a	h	h	h	h	h	h	h	h	h	h	h	h	b	h	h	h	h	h	h	h	b	h	h	h
UC-177	h	h	h	h	b	h	h	b	b	b	h	h	h	h	h	h	h	h	h	h	h	h	h	h	h	h	h	h	h	h	h	b	h	h	h	h	h	h	a	h	h	h	h	h	h	h	h	b	h
UC-178	a	h	h	h	h	b	h	h	h	h	h	h	h	b	h	b	h	h	h	h	h	h	h	h	h	h	b	h	h	h	h	h	h	h	h	b	h	h	h	h	h	h	h	h	h	h	h	h	h
UC-179	h	h	h	h	h	h	h	h	h	h	b	h	b	b	b	b	b	b	b	b	h	b	b	h	b	b	h	b	b	b	b	h	b	b	b	b	b	b	b	b	b	b	b	h	b	b	b	b	b
UC-180	h	h	h	h	h	h	h	h	h	h	h	h	h	h	h	h	h	a	h	h	h	h	h	h	h	h	h	h	h	h	h	h	h	a	h	h	h	h	h	h	h	h	h	h	h	h	h	h	h
UC-182	b	b	b	b	h	h	h	h	h	h	h	h	h	h	h	h	h	h	h	h	h	h	h	h	h	h	h	h	h	h	h	h	h	h	h	h	h	h	h	h	h	h	h	h	h	h	h	h	h
UC-183	b	h	b	b	b	b	b	h	h	h	h	h	h	h	h	h	h	h	h	h	h	h	h	h	h	h	h	h	h	h	h	h	h	h	h	h	a	h	h	h	h	h	h	h	h	h	h	h	h
UC-184	b	b	b	h	b	b	b	h	h	h	h	h	h	h	h	h	h	h	h	h	h	h	h	h	h	h	h	h	h	h	h	h	h	h	h	h	h	h	h	h	h	h	h	h	h	h	h	h	h
UC-185	b	b	b	b	h	h	h	h	b	h	a	h	h	h	h	h	h	h	h	h	h	h	h	h	h	h	h	a	a	h	h	h	h	b	h	b	h	h	h	h	h	h	h	h	h	h	h	h	h
UC-187	h	h	h	h	h	h	h	h	h	h	h	h	a	h	h	h	h	h	h	h	h	a	h	h	h	h	h	h	a	h	h	h	h	h	h	h	h	h	h	h	h	h	h	h	h	h	h	h	h
UC-188	b	h	b	b	b	b	b	b	b	b	b	b	b	h	b	b	b	b	b	b	b	b	b	b	b	b	b	b	b	b	h	h	b	b	b	b	b	b	b	b	b	b	b	b	b	b	b	b	b
UC-189	h	h	a	h	h	h	h	h	h	h	a	h	a	h	a	a	a	a	a	a	a	a	a	a	a	a	a	a	h	a	a	a	a	a	h	h	a	a	a	a	a	a	a	a	a	h	a	a	a
UC-18	b	b	b	b	h	h	h	h	h	h	h	h	h	h	h	h	h	h	h	h	b	h	h	h	h	h	h	h	h	h	h	h	h	h	h	h	h	h	h	h	h	h	h	h	h	h	h	h	h
UC-190	b	b	b	b	b	b	b	b	b	b	b	b	b	b	b	b	b	b	b	b	b	b	b	b	b	b	b	b	b	h	b	b	b	b	b	b	b	b	b	b	b	b	b	b	b	b	b	b	b
UC-191	h	h	h	h	h	a	a	a	h	a	a	a	a	a	a	a	h	a	a	a	a	a	a	a	a	a	a	a	a	a	a	a	a	a	a	a	a	a	a	a	a	a	a	a	a	a	a	a	a
UC-192	b	b	b	b	h	b	h	b	h	h	a	a	a	a	a	a	a	a	a	a	a	a	a	a	a	a	a	a	a	a	a	a	h	a	a	a	a	a	a	a	a	a	a	a	a	a	a	a	a
UC-193	a	a	a	a	a	a	a	h	h	h	h	h	h	h	h	a	a	h	h	h	a	a	a	h	h	h	h	a	h	h	h	h	h	h	h	h	h	h	h	h	b	h	h	h	h	h	h	h	h
UC-194	b	b	b	b	b	b	b	b	a	h	a	a	a	a	a	a	a	a	a	a	a	a	a	a	a	a	a	a	a	a	a	a	a	a	h	a	a	a	h	a	a	a	a	a	a	a	a	a	a
UC-195	h	h	h	h	h	h	h	b	h	h	-	h	h	b	h	b	h	h	h	h	h	h	h	h	h	h	b	h	h	h	h	h	h	h	h	a	b	h	h	h	h	h	b	h	h	h	h	h	h
UC-196	h	h	h	h	h	h	a	b	b	b	h	b	b	b	-	b	b	b	b	b	b	h	b	b	b	b	b	b	b	b	b	b	b	b	b	b	b	b	b	b	b	b	b	b	b	b	b	b	b
UC-199	h	h	h	h	h	h	a	h	h	h	b	h	h	h	h	h	h	h	h	b	h	h	h	h	h	h	h	h	h	b	h	h	h	h	h	h	h	a	h	h	h	h	h	h	h	h	h	h	h
UC-19	a	a	a	a	a	a	a	h	h	h	h	h	h	h	h	h	h	h	h	h	h	h	h	h	h	h	h	h	h	h	h	h	h	h	h	h	h	h	h	h	h	h	h	h	h	h	h	h	h
UC-1	b	b	b	b	b	b	b	b	b	b	h	b	b	b	b	b	h	a	h	h	h	h	h	h	h	b	a	a	h	h	h	h	b	h	h	h	h	h	h	h	h	h	h	h	h	h	h	b	h
UC-200	b	b	b	b	b	b	b	h	b	b	b	b	b	b	b	b	b	b	b	b	h	b	b	b	b	b	b	b	b	b	b	b	b	b	b	b	b	b	b	b	b	b	b	b	b	b	b	b	b
UC-201	h	h	h	h	h	h	h	h	h	h	h	b	h	h	h	a	b	h	h	h	h	h	h	h	a	h	h	a	-	h	b	h	h	h	h	h	h	h	h	h	h	h	h	h	h	h	h	h	h
UC-203	h	h	h	h	a	h	h	b	h	h	h	h	h	b	h	h	h	h	h	h	h	h	h	h	h	h	h	h	h	h	h	h	h	a	h	h	h	h	h	h	h	h	h	h	h	h	h	a	h
UC-204	h	h	h	h	h	h	h	a	h	h	h	h	a	a	h	h	h	h	h	a	h	h	h	a	a	a	a	h	h	a	h	b	a	h	h	h	h	h	a	a	a	h	h	h	h	h	h	h	h
UC-205	b	b	b	b	h	h	h	h	h	h	a	h	h	h	h	h	h	h	b	h	h	h	h	h	h	h	h	h	h	h	h	h	h	h	a	h	h	h	h	h	h	h	h	h	h	h	h	h	h
UC-206	h	h	h	h	h	h	h	h	a	h	a	h	h	h	h	h	h	h	h	b	h	h	h	h	h	h	h	h	h	h	h	h	h	h	h	h	h	h	h	h	h	h	h	b	h	h	h	h	h
UC-207	h	h	h	h	h	h	h	h	h	h	h	h	h	h	h	h	h	b	h	h	h	h	h	h	h	h	h	h	h	h	h	h	h	h	h	h	h	h	h	h	h	h	h	h	h	h	h	h	h
UC-208	a	a	a	a	a	a	a	a	a	a	a	h	h	h	h	h	a	h	h	h	a	h	a	h	a	h	h	h	h	h	h	h	h	h	h	h	h	h	h	h	h	h	h	h	h	h	h	h	h
UC-209	h	h	h	h	h	h	h	h	h	h	a	a	a	a	a	a	a	a	a	a	a	a	a	a	a	a	a	a	a	a	a	a	a	a	a	a	a	a	a	a	a	a	a	a	a	a	a	a	a
UC-20	h	h	h	h	h	h	h	h	h	a	a	a	a	a	a	a	a	a	a	a	a	a	a	h	a	a	a	a	a	a	a	a	a	a	a	a	a	a	a	a	a	a	a	a	a	a	a	a	a
UC-210	h	h	h	h	h	a	h	a	a	a	a	h	a	h	h	h	h	h	h	h	h	h	a	h	h	h	a	h	a	h	h	h	h	h	h	h	h	b	-	h	h	h	h	h	h	a	h	a	h
UC-211	h	h	h	h	h	h	h	h	h	h	h	h	h	h	h	h	h	h	h	h	h	h	h	h	h	h	h	h	h	h	h	h	h	h	h	h	h	a	h	h	h	h	h	h	h	h	h	h	h
UC-212	h	h	h	h	h	h	h	h	h	h	h	h	h	h	h	h	h	h	h	a	h	h	h	h	h	h	h	h	h	h	h	h	h	h	h	h	h	h	h	h	h	h	h	h	h	h	h	h	h
UC-213	h	h	h	h	h	h	a	h	h	h	b	h	h	h	b	b	b	h	a	h	b	b	b	h	h	h	h	b	h	h	h	h	b	h	h	b	b	b	h	h	h	h	h	h	h	b	b	b	b
UC-214	h	h	h	h	h	a	a	a	a	a	a	a	a	a	a	a	a	a	a	a	a	a	a	a	a	a	a	a	a	a	a	a	a	a	a	a	a	a	a	a	a	a	a	a	a	a	h	a	a
UC-215	h	h	h	h	h	h	h	h	h	h	h	h	h	h	h	h	h	h	h	h	h	h	h	h	h	h	h	h	h	h	h	h	h	h	h	h	h	h	h	h	h	h	h	h	h	h	h	h	h
UC-21	a	a	a	a	a	a	a	a	a	a	b	a	a	a	a	a	h	a	a	a	h	a	h	a	a	a	a	a	a	a	a	a	a	a	a	a	a	a	h	a	a	a	a	a	a	a	a	a	a
UC-223	a	h	a	a	a	a	a	h	h	h	h	h	h	h	h	b	h	h	h	h	h	h	h	h	h	h	h	h	h	h	h	h	h	h	h	h	h	h	h	h	h	h	h	h	h	h	h	h	h
UC-226	b	b	b	b	b	b	b	b	b	b	b	b	b	b	b	b	b	b	b	b	b	b	b	b	b	b	b	b	b	b	b	b	b	b	b	b	b	b	b	b	b	b	b	b	b	b	b	b	b
UC-227	h	h	h	h	h	h	h	h	h	h	b	h	h	h	h	h	h	h	h	h	h	b	h	h	h	h	h	h	h	h	h	a	h	b	h	h	h	h	h	h	h	h	h	h	h	h	h	h	h
UC-229	h	h	h	h	h	h	h	h	h	h	h	h	b	h	b	h	h	h	h	h	h	h	h	h	h	h	h	h	h	h	h	h	h	h	h	h	h	h	h	h	h	h	h	h	h	h	h	h	h
UC-235	b	b	b	b	h	b	h	h	h	a	a	a	a	a	a	a	a	a	a	a	a	a	a	a	h	a	a	a	a	a	a	a	a	a	a	a	a	a	a	a	a	a	a	a	a	h	a	a	a
UC-236	h	h	h	h	b	b	b	b	b	b	b	b	b	b	b	b	b	b	b	b	b	b	b	b	b	b	b	b	b	b	b	b	b	b	b	b	b	b	b	b	b	b	b	b	b	h	b	b	b
UC-237	b	b	b	b	b	b	b	b	b	b	b	b	b	b	b	h	b	b	b	b	b	b	b	b	b	b	b	b	b	b	b	b	b	b	b	b	b	b	b	b	b	b	b	b	b	b	b	h	b
UC-238	h	h	h	h	h	h	h	h	h	h	h	a	a	a	a	a	h	a	a	a	h	h	h	a	a	a	a	h	a	a	a	a	a	a	a	a	a	a	a	a	a	a	a	a	a	a	a	a	a
UC-239	h	h	h	h	a	a	a	a	a	a	h	h	h	h	a	h	h	h	h	h	h	h	h	h	h	h	h	h	h	h	h	h	h	h	h	h	h	h	h	h	h	h	a	h	h	h	h	h	h
UC-240	h	h	h	h	h	h	h	h	h	h	h	h	h	h	a	h	h	h	h	h	h	h	h	h	h	h	h	h	h	h	h	h	h	h	h	h	h	h	h	h	h	h	h	h	h	h	h	h	h
UC-244	h	h	h	h	h	h	h	h	h	h	h	h	h	h	h	h	b	h	h	h	h	h	h	h	h	h	h	h	h	h	h	h	h	b	h	h	h	h	h	h	h	h	h	h	h	h	h	h	h
UC-245	b	b	b	b	b	b	b	b	b	b	h	b	b	b	h	h	h	b	b	b	h	h	h	b	b	b	b	h	b	b	b	b	b	b	b	h	h	b	b	b	b	b	b	b	b	b	b	b	b
UC-246	h	h	h	h	a	b	h	b	b	b	a	b	b	b	h	b	h	h	h	b	h	h	h	h	h	b	h	h	h	h	h	h	h	h	h	h	h	h	h	h	h	h	h	h	h	h	h	h	h
UC-247	a	a	a	a	h	h	h	h	h	h	h	h	b	b	b	b	h	b	b	b	h	h	h	b	b	b	b	h	b	b	b	b	b	b	b	b	b	b	b	b	b	b	b	b	b	b	b	b	b
UC-248	h	h	h	h	h	h	h	h	h	a	a	a	h	a	a	a	a	a	-	a	a	a	a	a	a	a	a	a	a	a	a	a	a	a	a	a	a	a	a	a	a	a	a	a	a	a	a	a	a
UC-249	h	h	h	h	h	h	h	h	h	h	h	h	h	h	h	h	h	h	h	h	h	h	h	h	h	h	h	h	h	h	h	a	h	h	h	h	h	h	h	h	h	h	h	h	h	h	h	h	h
UC-24	a	a	a	a	a	a	a	a	a	a	h	h	h	h	b	h	h	b	h	h	h	h	h	h	b	h	h	h	h	h	h	h	a	h	h	a	h	h	h	h	h	h	b	h	h	h	a	h	h
UC-250	h	h	h	h	b	b	b	b	b	b	h	h	h	h	h	h	h	h	h	h	h	h	h	h	h	h	h	h	b	h	h	h	h	h	h	h	h	h	h	h	h	h	h	h	h	h	h	h	h
UC-251	b	b	b	h	b	b	b	h	b	h	h	h	h	h	-	h	h	h	h	h	h	h	h	h	h	h	h	b	h	h	h	h	h	h	h	h	h	h	h	h	h	h	h	h	h	h	h	h	h
UC-252	b	b	b	b	b	b	b	b	b	b	b	b	b	b	b	b	b	b	b	b	b	b	b	b	b	b	b	b	b	b	b	b	b	b	b	b	b	b	b	b	b	b	b	b	h	b	b	b	b
UC-253	h	h	h	h	h	h	h	a	h	h	b	b	b	b	b	b	b	h	b	b	b	b	b	b	b	b	b	h	b	b	b	b	b	b	b	b	b	b	b	b	b	b	b	b	b	b	b	b	b
UC-255	h	h	h	h	a	h	h	h	h	h	h	a	h	h	h	b	h	h	h	h	h	h	h	h	h	h	h	h	a	h	h	h	h	h	h	h	h	h	h	h	h	h	h	h	h	h	h	h	h
UC-256	b	b	b	b	a	h	h	h	h	h	h	h	h	b	h	h	h	h	h	a	h	h	h	h	h	h	h	h	h	h	h	h	h	h	h	h	h	h	h	h	h	h	h	h	h	h	h	h	h
UC-257	a	a	a	a	a	a	a	h	h	h	h	h	h	h	h	h	h	h	h	h	h	h	h	h	h	h	h	h	h	h	h	h	h	h	h	h	h	h	h	h	h	h	h	h	h	h	h	h	h
UC-258	a	a	a	a	a	a	a	a	a	h	h	h	h	h	h	h	h	h	h	h	h	a	h	h	h	h	h	h	h	h	h	h	h	h	h	b	h	h	h	h	h	h	h	h	h	h	h	h	h
UC-25	a	a	a	a	h	h	h	h	h	h	h	h	h	a	a	h	a	h	b	h	h	b	a	h	h	h	h	h	h	a	h	h	h	h	h	h	h	h	h	h	h	h	h	b	h	h	h	h	h
UC-262	h	a	h	h	a	a	a	a	a	a	a	a	a	a	a	a	a	h	a	a	a	a	a	a	a	a	a	a	a	a	a	a	a	a	a	a	a	a	a	a	a	a	a	h	h	a	a	a	a
UC-263	a	a	a	a	a	a	a	a	a	a	a	a	a	a	a	h	a	a	h	a	a	a	a	a	a	a	a	a	a	a	a	a	a	a	a	a	a	a	a	a	a	a	a	a	a	a	a	a	a
UC-264	b	b	h	b	b	b	b	b	b	b	b	b	b	b	b	b	b	b	b	b	b	b	b	b	b	b	b	b	b	b	b	b	b	b	b	b	b	b	b	b	b	b	b	b	b	b	b	b	b
UC-265	h	h	h	h	h	h	b	a	h	h	h	h	h	h	h	h	h	h	h	h	h	h	h	h	h	h	h	h	h	h	h	a	b	h	h	h	h	h	h	h	h	h	h	h	h	h	h	h	h
UC-266	a	a	h	a	a	a	a	a	a	a	h	h	h	h	h	a	b	h	h	h	h	h	h	h	h	h	h	h	h	h	h	h	h	h	h	h	h	h	h	h	h	h	h	h	h	h	h	h	h
UC-268	a	a	a	a	a	a	a	a	a	a	a	a	a	a	a	a	a	h	h	h	a	a	a	a	a	a	a	a	a	a	a	a	a	a	a	a	a	a	a	a	a	a	a	a	a	a	a	a	a
UC-269	a	a	a	a	a	a	a	a	a	a	a	a	a	a	a	a	a	a	a	a	a	a	a	a	a	a	a	a	a	a	a	a	a	a	a	a	a	a	a	a	a	a	a	a	a	a	a	a	a
UC-26	h	a	h	h	h	h	h	h	h	h	b	h	h	h	h	h	h	h	h	h	h	h	h	a	a	h	h	h	h	h	h	h	h	h	h	h	b	h	h	b	b	h	h	h	h	h	h	h	h
UC-270	a	a	a	a	a	a	a	h	h	h	h	h	h	h	h	h	h	h	h	h	h	h	h	h	h	h	b	b	h	h	a	h	h	h	h	h	h	h	h	h	h	h	h	h	h	h	a	h	h
UC-271	a	a	a	a	h	h	a	h	h	h	h	h	h	h	h	h	h	h	h	h	h	h	h	h	h	h	h	h	h	h	h	h	h	h	h	h	h	h	h	h	h	h	h	h	h	h	h	h	h
UC-272	h	h	h	h	a	h	h	h	h	h	h	h	h	h	h	h	h	h	h	h	h	h	h	h	h	h	h	h	h	h	h	b	h	h	h	h	h	h	h	h	h	h	h	h	h	h	h	h	h
UC-273	h	h	h	h	h	h	h	h	h	h	h	h	h	h	b	h	h	h	h	h	h	h	h	h	h	h	h	h	a	h	h	h	h	h	h	h	h	h	h	h	h	h	a	h	h	h	h	h	h
UC-274	h	h	h	h	h	h	h	h	b	h	h	h	h	h	a	h	h	h	h	h	h	h	h	h	h	h	h	h	h	h	h	h	h	h	h	a	h	h	h	h	b	h	h	h	h	h	a	h	h
UC-276	h	h	h	h	a	a	a	a	a	a	h	h	h	h	h	h	h	h	h	h	h	h	h	h	h	h	h	h	h	h	h	h	h	h	h	h	h	h	a	h	h	h	h	h	h	h	a	h	h
UC-277	h	h	h	h	h	h	h	-	h	h	h	h	h	h	h	h	h	h	h	h	h	h	h	h	h	h	h	h	h	h	h	h	h	h	h	h	h	h	b	h	h	h	h	h	h	h	h	h	h
UC-278	b	b	b	b	b	b	b	b	b	b	h	h	h	h	b	h	h	h	b	h	a	h	h	h	h	h	b	h	h	h	a	h	h	b	h	h	a	h	h	h	h	h	h	h	h	h	h	h	b
UC-27	h	h	h	h	h	h	h	h	h	h	h	h	h	h	h	h	h	h	h	h	h	h	h	h	h	h	h	h	h	h	h	h	h	h	b	h	h	h	h	h	h	h	h	h	h	h	h	h	h
UC-282	a	a	a	a	b	b	b	b	b	b	b	b	b	b	b	b	b	b	b	b	b	b	b	h	b	b	b	b	b	b	b	b	b	b	b	b	b	b	b	b	b	b	b	b	b	b	b	b	b
UC-283	h	h	h	h	h	h	h	h	b	b	b	b	b	b	b	b	b	b	b	b	b	b	b	b	b	b	b	b	b	h	b	b	b	b	b	b	b	b	b	b	b	b	h	b	b	b	b	b	b
UC-288	h	h	h	h	a	a	h	a	a	a	a	a	a	a	a	a	a	a	a	a	h	a	a	a	a	a	a	h	a	a	a	a	a	a	a	a	a	a	a	a	a	a	a	a	a	a	a	a	a
UC-289	a	a	a	a	a	a	a	a	a	a	b	a	a	a	h	h	h	a	a	a	h	h	h	a	a	a	a	h	a	a	a	a	a	a	h	h	a	h	h	h	h	a	a	h	h	h	h	h	h
UC-28	h	h	h	h	h	h	h	a	h	h	a	a	h	a	h	a	a	a	a	a	a	a	a	a	a	h	a	a	a	a	a	a	a	a	-	a	a	a	a	a	a	a	a	a	a	a	a	a	a
UC-295	h	h	h	h	h	h	h	h	h	h	h	h	h	h	h	h	h	h	h	h	h	h	h	h	h	h	h	h	h	h	h	h	h	h	h	h	h	h	h	h	h	h	h	h	h	h	h	h	h
UC-29	b	b	b	b	b	b	b	b	b	h	b	b	b	h	b	b	b	b	b	b	b	b	b	b	b	b	b	b	b	b	b	b	b	b	b	b	b	b	b	b	b	h	b	b	b	b	b	b	b
UC-300	a	a	a	a	h	a	a	a	a	a	a	a	a	a	a	a	a	a	a	a	a	a	a	a	-	a	a	a	a	a	a	a	a	a	a	h	a	a	a	a	a	a	h	a	a	a	a	a	a
UC-301	h	h	h	h	h	a	h	b	b	b	b	b	b	b	b	b	b	b	h	b	b	b	b	b	b	b	b	b	b	b	b	b	b	b	b	b	b	b	b	b	b	b	b	b	b	b	b	b	b
UC-302	a	a	a	a	a	h	a	h	h	h	b	b	b	b	b	b	b	b	b	b	b	b	b	b	b	b	b	b	b	b	b	b	b	b	b	b	b	b	b	b	b	b	b	b	h	b	b	b	b
UC-303	b	b	h	b	b	b	b	h	h	b	a	h	b	h	h	h	a	b	h	h	a	a	a	h	a	h	h	a	h	h	h	h	h	h	h	b	h	h	h	b	b	h	h	h	h	h	h	h	h
UC-304	h	h	h	h	a	h	-	h	h	h	a	a	a	a	h	a	h	a	a	a	a	a	a	h	a	a	a	a	a	a	a	a	a	a	a	a	a	a	a	h	h	a	a	a	a	h	a	a	a
UC-306	b	b	b	b	b	b	b	b	b	b	h	b	b	b	h	a	h	b	b	b	h	h	h	b	b	b	b	h	b	b	b	b	b	b	b	h	h	b	b	b	b	b	b	b	b	b	b	b	b
UC-308	h	h	a	h	b	b	b	b	b	b	b	b	b	b	b	b	b	b	b	b	b	b	b	b	b	b	b	b	b	b	b	b	b	b	b	b	b	b	b	b	b	b	b	b	b	b	b	b	b
UC-30	b	h	h	h	h	b	a	a	h	h	b	h	a	h	-	h	b	h	h	h	b	b	b	h	b	h	h	b	h	a	a	h	h	-	h	h	h	b	h	h	h	h	h	h	h	h	h	h	h
UC-310	h	h	b	h	h	a	h	h	h	h	h	b	h	h	a	h	a	h	h	a	h	h	h	h	h	h	h	h	h	h	h	h	b	h	h	h	h	a	h	h	h	h	h	h	h	h	h	h	h
UC-312	h	h	h	h	-	h	h	b	h	h	a	h	h	h	b	h	a	h	h	h	a	a	a	h	h	h	h	a	h	h	h	h	h	h	b	h	h	h	h	h	h	h	h	h	h	h	h	h	h
UC-313	a	a	a	a	a	a	a	a	a	a	h	a	h	a	a	a	a	a	a	h	h	a	a	a	a	a	a	a	a	a	a	a	a	a	a	a	a	a	a	a	a	a	a	a	a	a	a	a	a
UC-314	b	b	b	b	b	b	b	b	b	b	h	h	h	h	h	h	h	h	h	h	h	h	h	a	h	h	h	h	h	h	h	h	h	h	h	h	h	h	h	h	h	h	h	h	h	h	h	h	h
UC-315	b	b	b	b	b	b	b	b	h	b	h	b	b	b	b	b	b	b	b	b	b	b	b	b	b	b	b	b	b	b	b	b	b	b	b	b	b	b	b	b	b	b	b	b	b	b	b	b	b
UC-316	h	h	h	h	h	h	h	h	h	h	h	h	h	h	b	h	h	h	h	h	h	h	h	h	h	h	h	h	h	h	h	h	h	h	h	h	h	h	h	h	h	h	h	h	h	h	h	h	h
UC-319	a	a	a	a	a	a	a	a	a	a	a	a	a	h	h	a	a	h	a	a	a	a	a	a	a	a	a	a	h	a	a	a	a	a	a	a	a	a	a	a	a	a	a	a	a	a	a	a	a
UC-31	h	b	h	h	h	h	h	h	h	h	a	a	a	a	a	a	a	h	a	a	a	a	a	a	a	a	a	a	a	a	a	a	a	a	a	a	a	a	a	a	a	a	a	a	a	a	a	a	a
UC-320	h	h	h	h	h	h	h	b	b	b	b	b	b	b	b	b	b	b	b	b	b	b	b	b	b	b	b	h	b	b	b	b	b	b	b	b	b	b	b	b	b	b	b	b	b	b	b	b	b
UC-321	b	b	b	b	h	h	h	h	h	h	a	b	h	h	a	a	a	a	a	h	a	a	a	h	h	h	h	a	a	h	a	a	h	a	a	a	a	a	a	h	h	h	a	a	a	a	a	a	a
UC-322	h	h	h	h	a	a	a	a	a	a	a	a	a	h	a	a	a	a	a	a	a	a	a	a	a	h	a	a	a	a	a	a	a	a	a	a	a	a	a	a	a	a	a	a	a	a	a	a	a
UC-323	a	a	a	a	a	a	a	a	a	a	h	a	a	a	h	h	h	a	a	a	h	h	h	a	a	a	a	h	a	h	a	a	a	a	a	a	a	h	a	a	a	a	a	a	a	a	a	a	a
UC-324	a	a	a	a	a	a	a	a	a	a	h	h	h	h	h	h	h	h	b	h	h	a	h	h	h	h	h	h	h	h	h	h	h	h	h	h	h	h	h	h	h	h	h	b	h	h	h	h	h
UC-326	h	h	h	h	a	a	a	a	a	h	h	h	h	h	h	h	h	h	h	h	h	h	h	b	h	h	h	h	h	h	h	h	h	h	h	h	h	h	h	h	h	b	h	h	h	h	h	h	h
UC-327	b	-	b	b	b	b	b	b	b	b	h	b	b	b	b	b	h	b	b	b	a	h	h	b	b	b	b	a	b	b	b	b	h	b	b	b	b	b	b	b	b	b	b	b	b	b	b	b	b
UC-328	b	b	b	b	b	b	b	b	b	b	b	h	b	b	b	b	h	b	b	b	b	b	h	b	h	b	b	b	b	b	b	b	b	b	b	b	b	b	b	b	b	b	b	b	b	b	b	b	b
UC-329	h	h	h	h	h	h	h	a	h	h	h	h	h	h	h	h	h	h	h	h	h	h	h	h	h	h	h	h	h	h	h	h	h	h	h	h	h	h	h	h	h	h	h	h	h	h	h	h	h
UC-32	h	h	h	h	h	h	h	h	h	h	b	h	h	h	h	h	b	h	h	h	b	b	b	h	h	h	h	h	h	h	h	h	h	h	h	h	h	h	h	h	h	h	h	h	h	h	h	h	h
UC-330	b	h	h	h	a	h	h	h	h	h	a	a	a	h	a	a	a	a	a	a	a	a	a	a	a	a	a	a	a	a	h	a	a	a	a	a	a	a	a	a	a	a	a	a	a	a	a	a	a
UC-331	a	a	a	a	a	a	a	a	a	a	a	a	a	a	a	a	a	a	a	a	a	a	a	a	a	a	a	a	a	a	a	a	a	a	a	a	a	a	a	a	a	a	a	a	a	a	a	a	a
UC-335	b	b	b	b	h	h	h	h	b	h	h	h	h	h	h	h	h	h	a	h	h	h	h	h	h	h	h	h	h	h	h	b	h	h	a	h	h	h	h	h	h	h	h	h	h	h	h	h	h
UC-336	b	b	b	b	b	b	b	b	h	h	h	h	h	h	h	h	h	b	h	h	h	h	h	h	h	h	h	h	h	h	h	h	h	h	h	h	h	h	h	h	h	h	h	h	h	h	b	h	h
UC-337	a	a	a	a	h	a	a	a	a	a	a	a	a	a	h	a	a	h	a	a	a	a	a	a	a	a	a	a	a	a	a	a	a	a	a	a	a	a	a	a	a	a	a	a	h	a	a	a	a
UC-338	a	h	h	h	b	b	b	b	b	b	h	b	b	b	b	b	a	b	b	b	h	h	h	b	b	b	b	h	b	b	b	b	b	h	b	h	b	b	b	b	b	b	b	b	b	b	b	b	b
UC-339	h	h	h	h	h	h	h	h	h	h	b	b	b	b	b	b	b	b	h	b	b	b	b	h	h	b	b	b	b	b	b	b	b	b	b	b	h	b	b	b	b	b	b	b	b	b	b	b	b
UC-33	h	h	h	h	h	a	h	h	-	h	b	h	h	h	h	h	h	h	h	h	h	h	h	h	h	h	h	h	h	h	h	h	h	h	h	h	h	h	h	h	h	h	h	h	h	a	h	h	h
UC-340	h	h	h	h	h	h	h	h	h	h	h	b	b	b	b	b	h	b	b	b	h	h	h	b	b	b	b	h	b	b	b	b	b	b	b	b	b	b	b	b	b	h	b	b	b	b	b	b	b
UC-341	h	h	h	h	h	h	h	h	b	h	b	h	b	b	b	b	h	b	b	b	b	b	b	b	b	b	b	b	b	b	b	b	b	b	b	b	b	b	b	b	b	b	b	b	b	b	b	b	b
UC-343	h	h	h	h	b	b	b	h	h	h	h	h	h	h	h	h	h	h	h	h	h	h	h	h	h	h	h	h	h	h	h	h	h	h	h	h	h	h	h	h	h	h	h	h	h	h	h	h	h
UC-344	a	a	a	a	a	a	a	a	a	a	b	h	h	h	a	h	b	h	h	h	b	b	b	h	h	h	h	b	h	h	h	h	h	h	h	h	h	h	h	h	h	h	h	h	h	h	h	h	h
UC-346	b	b	b	b	b	b	b	b	b	b	b	b	b	b	b	b	b	b	b	b	b	b	b	h	b	b	b	b	b	b	b	b	b	b	b	b	b	b	b	b	b	b	b	b	b	b	b	b	b
UC-347	a	a	a	h	h	h	h	h	h	h	h	h	h	h	a	a	h	a	h	h	h	b	h	h	h	h	h	h	h	h	h	h	h	h	h	h	h	h	h	h	h	a	h	h	h	h	h	h	h
UC-348	h	h	h	h	h	h	a	b	h	b	h	b	b	b	h	h	h	h	b	b	h	h	h	h	b	b	h	h	b	b	h	h	h	h	h	h	h	h	h	b	b	h	h	h	h	h	h	h	h
UC-349	h	h	h	b	h	a	a	a	a	a	a	a	a	a	-	a	a	a	a	a	a	a	a	a	a	a	a	h	h	a	a	a	a	a	a	a	a	a	a	a	a	a	a	a	a	a	a	a	a
UC-34	a	a	a	a	a	a	a	a	a	h	h	h	b	h	h	h	h	h	h	h	h	h	h	h	h	h	h	h	h	h	h	h	h	h	h	h	h	h	h	h	h	h	h	h	h	h	h	h	h
UC-350	h	h	h	h	h	h	h	h	h	h	h	h	h	h	h	h	h	h	a	h	h	h	h	h	h	h	h	h	h	h	h	h	h	h	h	h	h	h	h	h	h	h	h	h	h	h	h	h	h
UC-351	a	a	a	a	a	a	a	a	a	a	b	a	a	a	a	a	h	a	a	a	h	h	h	a	a	a	a	h	a	a	a	h	a	a	a	a	a	a	a	a	a	a	a	a	a	a	a	a	a
UC-354	h	h	h	h	a	a	a	a	a	a	a	a	a	a	a	a	a	a	a	a	a	a	a	a	a	a	a	a	a	a	a	a	a	a	a	h	a	a	a	a	a	a	a	a	a	a	a	a	a
UC-355	h	h	h	h	h	h	h	h	h	h	b	b	b	b	b	h	b	b	b	b	b	b	b	b	b	b	b	b	b	b	b	b	b	b	b	b	b	b	b	b	b	b	b	b	b	b	b	b	b
UC-357	b	b	b	b	b	b	b	h	b	b	b	b	b	h	b	b	b	b	b	b	b	b	b	b	b	b	b	b	b	b	b	b	b	b	b	b	b	b	b	b	b	b	b	b	b	b	b	b	b
UC-358	h	h	h	h	h	h	a	h	h	h	a	h	a	a	a	a	a	a	a	a	a	a	a	a	a	a	a	a	a	a	a	a	a	a	a	a	a	a	a	a	a	a	a	a	a	a	a	a	a
UC-359	b	b	b	b	h	h	h	h	h	h	h	h	h	h	h	h	h	h	h	h	h	h	h	h	h	h	h	h	h	h	h	b	h	h	h	h	h	h	h	h	h	h	h	b	h	h	h	h	h
UC-35	a	a	a	a	a	a	a	a	a	a	h	a	a	a	h	h	h	h	h	a	h	h	h	h	a	a	h	h	h	a	h	h	h	h	h	h	h	h	h	a	a	h	h	h	h	h	h	h	h
UC-360	h	h	h	h	h	h	h	h	h	h	h	h	h	h	h	h	h	h	h	h	h	h	h	h	h	h	h	h	h	h	h	h	h	h	h	h	h	h	h	h	h	h	h	h	h	h	h	h	h
UC-361	h	h	h	h	a	a	a	a	a	a	a	a	a	a	a	a	a	a	a	a	a	a	a	a	a	a	h	a	a	a	a	a	a	a	h	a	a	a	a	a	a	a	a	a	a	a	a	a	a
UC-362	h	h	h	h	h	h	h	h	h	h	h	h	h	h	h	h	h	h	h	h	h	h	h	h	h	h	h	h	h	h	h	b	h	h	h	h	h	h	h	h	h	h	h	h	h	h	h	h	h
UC-363	h	h	h	h	h	h	h	h	h	h	b	b	b	b	b	b	b	b	b	b	b	b	b	b	b	b	b	b	b	b	b	b	b	b	b	b	b	b	b	b	b	b	b	b	b	b	b	b	b
UC-364	h	h	h	h	h	a	h	h	h	h	h	h	h	h	h	h	h	h	h	h	h	h	h	h	b	h	h	h	h	h	h	h	h	h	h	h	h	h	h	h	h	h	h	h	h	h	h	h	h
UC-365	h	h	h	h	h	h	h	h	h	h	a	h	h	h	a	a	a	h	h	h	a	a	a	h	h	h	h	a	h	h	h	h	h	h	h	h	h	h	h	h	h	h	h	h	h	h	h	h	h
UC-366	h	h	h	h	h	h	h	b	b	b	b	b	b	b	b	b	b	b	b	b	b	b	b	b	h	b	b	b	b	b	b	b	b	b	b	b	b	b	b	b	b	b	h	b	b	b	b	b	b
UC-367	h	h	h	h	h	h	h	h	h	h	b	h	h	h	b	b	b	b	b	h	b	b	b	b	h	h	b	b	b	h	b	b	b	b	b	b	b	b	b	h	h	b	b	b	b	b	b	b	b
UC-368	a	a	a	a	a	a	a	a	h	h	a	h	h	h	b	h	h	h	h	h	a	a	a	h	h	h	h	a	h	h	h	h	h	h	h	h	h	h	h	h	h	h	h	h	h	h	h	h	h
UC-369	h	h	b	h	a	a	a	a	a	a	h	a	h	h	h	h	h	h	h	h	h	h	h	h	h	h	h	h	h	h	h	h	h	h	h	h	h	h	h	h	h	h	h	h	h	h	h	h	h
UC-36	b	b	b	b	b	b	b	b	b	b	b	b	b	b	b	b	h	b	b	b	b	b	b	b	-	b	b	b	b	b	b	b	b	b	b	b	b	h	b	b	b	b	b	b	b	b	b	b	b
UC-370	a	a	a	a	h	h	h	b	b	h	h	h	h	h	h	h	h	h	h	h	h	h	h	h	h	h	h	h	h	h	h	h	h	h	a	b	h	h	b	h	h	h	h	h	h	h	h	h	h
UC-371	h	h	h	h	h	h	h	h	h	h	h	b	h	h	h	b	b	h	h	h	b	b	b	h	h	h	h	b	h	h	h	h	h	h	h	h	h	h	h	h	h	h	h	h	h	h	h	h	h
UC-374	h	h	h	h	h	h	h	h	h	h	b	b	b	b	b	b	b	b	b	b	b	b	b	b	b	b	b	b	b	b	b	b	b	h	b	b	b	b	b	b	b	b	b	b	b	b	b	b	b
UC-375	h	h	h	h	a	a	a	a	a	a	a	a	a	a	a	a	a	a	a	a	a	a	a	a	a	a	a	a	a	a	a	a	a	h	a	a	a	a	a	a	a	a	a	a	a	a	a	a	a
UC-37	h	h	h	h	a	a	a	a	a	a	h	h	h	h	b	h	h	a	h	h	h	h	h	h	h	h	h	a	b	h	a	h	h	h	h	h	h	h	h	h	h	h	h	h	h	h	h	h	h
UC-384	h	h	h	h	h	h	h	a	b	b	b	b	b	b	b	b	b	b	b	b	b	b	b	b	b	b	b	b	b	b	b	b	b	b	b	b	b	b	b	b	b	b	b	b	b	b	b	b	b
UC-387	b	b	b	b	b	b	b	h	b	b	h	b	b	b	b	b	a	b	b	b	h	h	b	b	b	b	b	h	b	b	b	b	b	b	b	b	b	b	b	b	b	b	b	b	h	b	b	h	b
UC-388	h	h	h	h	h	h	h	h	a	a	h	a	a	a	a	a	a	a	a	a	a	a	a	a	a	a	a	a	a	a	a	a	a	a	a	a	a	a	a	a	a	a	a	a	a	a	a	a	a
UC-389	a	a	a	a	a	h	a	a	a	a	h	a	a	a	b	h	h	a	a	a	h	h	h	a	a	a	a	h	a	a	a	a	a	a	h	h	h	h	h	a	a	h	a	h	h	h	h	h	h
UC-38	b	b	b	b	b	b	b	b	b	b	h	b	b	b	h	h	h	b	b	b	h	h	h	b	b	b	b	h	b	b	b	b	b	b	b	h	h	b	b	b	b	b	b	b	b	b	b	b	b
UC-390	b	b	b	b	b	b	b	h	b	b	h	h	h	h	h	h	h	h	b	h	h	h	h	h	b	h	h	h	h	a	h	h	h	h	h	h	h	h	h	h	h	b	h	h	h	h	h	h	h
UC-391	h	h	h	h	b	b	b	b	b	b	h	b	b	b	b	b	h	b	b	b	h	h	h	b	b	b	b	h	b	b	b	b	b	b	b	b	b	b	b	b	b	b	b	b	b	b	b	b	b
UC-392	h	h	h	h	h	h	h	h	b	b	h	b	h	b	b	b	h	b	b	b	h	h	h	b	b	b	b	h	b	b	b	b	b	b	b	b	b	b	b	b	b	b	b	h	b	b	b	b	b
UC-393	h	h	h	h	h	h	h	a	h	h	b	b	b	b	b	b	b	b	b	b	b	b	b	b	b	b	b	b	b	b	b	b	b	b	b	b	b	b	b	b	b	b	b	b	b	b	b	b	b
UC-394	a	a	a	a	h	h	h	h	h	h	h	h	h	h	h	b	a	h	h	h	a	a	a	h	h	h	h	a	h	h	h	h	h	h	h	h	h	h	h	h	h	h	h	h	h	h	h	h	h
UC-396	h	h	h	h	h	h	h	h	h	h	b	h	h	h	h	b	h	h	h	h	h	h	h	h	h	h	h	h	h	h	h	h	h	h	h	h	h	h	h	h	h	h	b	h	a	h	h	h	a
UC-399	h	h	h	h	-	a	a	a	a	a	a	a	a	a	a	a	a	a	a	a	a	a	a	a	a	a	a	a	a	a	a	a	a	a	a	a	a	a	a	a	a	a	a	a	a	a	a	a	a
UC-39	h	h	h	h	h	h	h	h	h	h	a	a	a	a	a	a	a	a	a	a	a	a	a	a	a	a	a	a	a	a	a	a	a	a	a	a	a	a	a	a	a	a	a	a	a	a	a	a	a
UC-3	h	h	h	h	b	b	b	h	b	b	a	b	b	b	b	-	b	b	b	b	h	h	h	b	h	b	b	h	b	b	b	b	b	b	b	b	b	b	b	b	b	b	b	b	b	b	b	b	b
UC-400	b	b	b	b	b	b	b	b	b	b	a	b	b	h	b	b	h	b	b	h	h	h	h	b	b	b	b	b	h	b	b	b	h	b	b	b	b	b	b	b	b	b	b	b	b	b	b	b	b
UC-401	a	a	a	a	a	a	a	h	h	h	h	h	h	h	h	h	h	h	h	h	h	b	h	h	a	h	h	h	h	h	b	h	h	h	h	h	b	h	h	h	h	h	h	h	h	h	h	h	h
UC-404	b	b	b	b	h	b	h	h	h	h	a	h	h	h	h	h	h	h	h	h	h	h	h	h	h	b	b	h	h	h	h	h	h	h	h	h	h	a	h	h	h	a	h	h	h	h	h	h	h
UC-406	h	h	h	h	a	b	h	h	h	h	b	b	b	b	b	b	h	b	b	b	h	h	h	b	b	b	b	b	b	b	b	b	b	b	b	b	b	h	b	b	b	b	b	b	b	b	b	b	b
UC-407	b	b	b	b	b	b	b	b	b	b	h	a	h	h	h	-	h	h	a	h	h	h	h	h	h	h	h	h	h	h	h	b	h	h	h	b	h	h	h	h	h	h	h	h	h	h	h	h	h
UC-40	h	b	h	b	h	h	h	h	h	h	h	h	h	b	h	h	a	b	b	a	h	h	b	h	h	h	a	h	h	h	h	a	h	h	a	a	b	h	h	h	h	h	h	h	a	h	h	h	h
UC-413	b	b	b	b	h	b	h	h	h	h	h	h	h	h	h	b	h	h	h	h	h	h	h	h	h	h	h	h	h	h	h	h	h	h	h	h	h	h	h	h	h	h	h	h	h	h	h	h	h
UC-414	a	a	a	a	a	h	a	h	a	a	h	h	h	h	h	h	h	h	h	h	h	h	h	h	h	h	h	h	h	h	b	h	h	h	h	h	h	h	h	h	h	h	h	h	h	h	h	h	h
UC-415	b	b	b	b	b	b	h	b	b	b	h	b	h	h	a	h	h	h	h	h	h	h	h	b	h	h	b	h	h	h	h	h	b	h	h	h	h	h	h	h	h	h	h	h	h	h	h	h	h
UC-417	a	a	a	a	h	b	h	a	h	h	h	b	h	h	h	h	h	h	b	h	h	h	h	h	h	h	h	h	h	h	h	h	h	h	h	h	h	h	h	h	h	h	h	h	b	h	h	h	h
UC-419	a	a	a	a	a	a	h	h	h	h	b	b	b	b	b	b	b	b	b	b	b	b	b	b	b	b	b	b	b	b	b	b	b	b	b	b	b	b	b	b	b	b	b	b	b	b	b	b	b
UC-41	a	h	a	a	h	h	h	-	h	h	b	b	h	h	h	a	b	h	h	h	b	h	b	h	h	h	h	h	h	h	h	h	h	h	a	h	a	h	a	h	h	a	h	h	h	a	h	h	h
UC-421	h	h	h	h	h	h	h	h	h	h	a	h	h	h	h	h	h	h	h	h	h	h	h	h	h	h	h	h	h	h	h	h	h	h	h	h	h	a	h	h	h	h	h	h	h	h	h	h	h
UC-422	h	h	h	h	h	h	h	h	a	a	h	a	a	h	a	a	h	a	a	h	h	a	h	a	a	a	a	a	a	a	a	a	a	a	a	a	a	a	a	a	a	a	a	a	a	a	a	a	a
UC-423	a	a	a	a	a	a	a	a	a	a	a	a	h	h	a	b	h	h	h	a	h	a	h	b	h	h	h	h	h	h	h	h	h	h	h	h	h	h	h	h	h	h	h	h	h	h	h	-	h
UC-424	a	a	a	a	a	a	a	h	b	h	b	h	b	b	b	b	b	h	-	b	b	b	b	b	b	b	b	b	b	b	b	b	b	b	b	b	h	b	b	b	b	b	b	b	b	b	b	b	b
UC-428	h	h	h	h	h	h	h	h	h	h	h	h	h	h	h	h	h	h	h	h	h	h	h	a	h	h	a	h	b	h	h	h	a	h	h	h	h	h	h	h	h	a	h	h	h	h	h	h	h
UC-42	a	h	h	h	h	h	h	h	h	h	b	b	h	h	b	b	h	h	h	-	h	h	h	h	h	h	b	a	a	h	h	a	h	h	h	h	b	h	a	h	h	h	b	h	h	h	-	h	h
UC-431	b	b	b	b	b	b	b	b	b	b	b	b	b	b	b	b	b	b	b	b	b	b	b	b	b	b	b	b	b	b	b	b	b	b	b	b	b	b	b	b	b	b	b	b	b	b	b	b	b
UC-432	h	h	h	h	h	h	h	h	b	h	h	h	h	h	h	h	a	h	h	h	h	h	h	h	h	h	h	h	h	h	h	h	h	h	h	h	h	h	h	h	h	h	h	h	h	h	h	h	h
UC-435	h	b	b	b	b	h	h	b	b	b	b	b	b	b	b	b	b	b	b	b	b	b	b	b	b	b	b	b	b	b	b	b	b	b	b	b	b	b	b	b	b	b	b	b	b	b	b	b	b
UC-436	b	b	b	b	b	b	b	b	b	b	b	b	b	b	b	b	b	b	b	b	b	b	b	b	b	b	b	b	b	b	b	b	b	b	b	b	b	b	b	b	b	b	b	b	b	b	b	b	b
UC-437	h	h	h	h	b	b	b	b	b	b	b	b	b	b	b	b	b	b	b	b	b	b	b	b	b	b	b	b	b	b	b	b	b	b	b	b	b	b	b	b	b	b	b	b	b	b	b	b	b
UC-43	a	a	a	h	a	a	a	a	a	a	h	a	a	a	h	b	h	h	h	h	h	h	h	h	h	h	h	h	h	h	h	h	h	h	h	h	h	h	h	h	h	h	h	h	h	h	h	h	h
UC-441	h	h	h	h	h	h	h	b	h	h	b	b	b	b	b	b	b	b	b	b	b	h	b	b	b	b	b	h	b	b	b	b	b	b	h	b	b	b	b	b	b	b	b	b	b	b	b	b	b
UC-442	b	b	b	b	h	h	h	a	h	h	h	h	h	h	h	h	h	h	h	h	h	h	h	h	h	a	b	h	h	h	h	h	h	h	h	h	h	h	h	h	h	h	h	h	h	h	h	h	h
UC-444	h	h	h	h	h	h	h	h	h	h	h	h	h	h	h	h	h	h	h	h	h	h	h	h	h	h	h	h	h	h	h	h	h	h	h	h	h	h	h	h	h	h	h	h	h	h	h	h	h
UC-445	h	h	h	h	h	b	b	b	b	b	h	h	h	h	h	h	h	h	h	h	h	h	h	h	h	h	h	h	h	h	h	h	h	h	h	h	h	h	h	h	h	h	h	h	h	h	h	h	h
UC-446	b	b	b	b	h	h	h	h	h	h	a	a	a	a	a	a	a	a	a	a	a	a	a	a	a	a	a	a	h	a	a	a	a	a	a	a	a	a	a	a	a	a	a	a	a	a	a	a	a
UC-447	h	a	a	a	a	h	a	a	a	h	b	h	h	h	b	h	b	b	b	b	b	b	b	b	b	h	b	b	b	b	b	h	b	b	b	b	b	b	b	b	b	b	b	b	b	b	b	b	b
UC-44	b	b	b	b	b	h	b	b	b	b	b	b	b	b	b	b	b	b	b	b	b	b	b	b	b	b	b	b	b	b	b	b	b	h	b	b	b	b	b	b	b	b	b	b	b	b	b	b	b
UC-450	h	h	h	h	b	h	h	a	h	h	b	h	h	h	h	b	b	a	b	h	b	b	b	h	h	h	h	b	h	h	h	h	h	h	h	h	h	h	h	h	h	h	h	h	h	h	h	h	h
UC-452	a	a	a	a	a	a	a	a	a	a	b	a	a	a	a	a	h	a	a	a	h	h	h	a	a	a	a	h	a	a	a	a	a	h	a	a	a	a	a	a	a	a	a	a	a	a	a	a	a
UC-455	h	h	h	h	h	a	h	h	h	h	b	h	h	h	h	h	a	h	h	h	h	h	h	a	h	h	h	h	h	h	h	h	h	h	b	a	h	h	h	h	h	h	h	b	b	h	h	h	h
UC-458	h	h	h	b	h	h	h	h	h	h	h	h	h	h	h	h	h	h	h	h	h	h	h	h	h	b	h	h	b	a	h	h	h	h	h	h	h	a	h	h	h	h	h	h	h	h	h	a	b
UC-459	b	b	b	b	b	b	b	b	h	h	h	h	h	h	h	h	h	h	h	h	h	h	h	h	h	b	h	h	h	h	h	h	h	h	h	h	h	h	h	h	h	h	h	h	h	h	h	h	h
UC-460	a	a	a	a	a	a	h	h	h	h	h	h	h	h	h	a	h	h	h	h	h	h	h	h	h	h	h	h	h	h	h	h	h	h	h	h	h	h	h	h	h	h	h	h	h	h	h	h	h
UC-463	b	b	h	b	b	b	b	b	b	b	b	b	b	b	b	b	b	b	b	b	b	b	b	h	b	b	b	b	b	b	b	b	b	b	b	b	b	b	b	b	b	b	b	b	b	b	b	b	b
UC-464	h	h	h	h	a	a	a	a	a	a	a	a	a	a	a	a	a	a	a	a	a	a	a	a	a	a	a	a	a	a	a	h	a	a	a	a	a	a	a	a	a	a	a	a	a	a	a	a	a
UC-465	h	h	h	h	h	h	h	h	h	h	a	h	h	h	a	a	a	a	a	a	a	a	a	a	a	h	a	a	a	a	a	a	a	a	a	a	a	a	a	a	a	a	a	a	a	a	a	a	a
UC-466	b	b	b	b	b	b	b	b	h	h	h	h	h	h	a	h	h	h	h	h	h	h	h	h	h	h	h	h	h	h	h	h	h	h	h	h	h	h	h	h	h	h	h	h	h	h	h	h	h
UC-467	h	h	h	h	h	h	h	h	h	h	b	b	b	b	b	b	b	b	b	b	b	b	b	b	b	b	b	b	b	b	b	b	b	b	b	b	b	b	b	b	b	b	b	b	b	b	b	h	b
UC-468	h	h	h	h	h	h	h	a	h	h	b	b	b	b	b	b	b	b	b	b	b	b	b	b	b	b	b	b	b	h	b	b	b	b	b	b	h	b	b	b	b	b	b	b	b	b	b	b	b
UC-469	b	b	b	b	h	h	h	h	b	h	h	h	h	h	h	h	h	h	h	h	h	h	b	h	h	h	h	h	h	h	h	h	h	h	b	h	h	h	a	h	h	h	h	h	h	h	h	h	h
UC-46	a	a	a	a	a	a	h	h	h	h	h	h	h	h	h	h	h	h	h	h	a	b	h	a	h	h	h	h	h	h	h	h	h	h	h	b	h	h	h	h	h	h	h	h	h	h	h	h	h
UC-470	h	h	h	h	h	h	h	h	h	h	b	h	h	h	h	h	b	h	h	h	b	b	b	h	h	h	h	b	h	h	b	h	h	h	h	h	h	h	h	h	h	h	h	h	h	h	h	h	h
UC-471	h	h	h	h	h	h	h	h	h	h	h	h	h	h	h	h	h	b	h	h	h	a	h	h	h	h	h	h	h	h	h	h	h	h	h	h	h	h	h	h	h	h	h	h	h	h	h	h	h
UC-472	h	h	h	h	h	h	h	b	h	h	h	h	h	h	h	h	h	h	b	h	h	h	h	h	h	h	b	h	h	h	b	h	h	h	h	h	h	h	a	h	h	h	h	h	h	h	h	h	h
UC-473	h	h	h	h	a	a	a	h	a	a	b	h	h	h	h	h	h	b	h	h	h	h	h	a	h	h	h	h	h	h	h	h	b	h	h	h	h	h	h	h	h	h	h	h	h	h	h	h	h
UC-486	a	a	a	a	a	a	a	a	a	a	a	a	a	a	a	a	a	a	a	a	a	a	a	a	a	a	a	a	a	a	a	a	a	a	a	a	a	a	a	a	a	a	a	a	a	a	a	a	a
UC-489	h	h	h	h	h	h	h	h	h	h	h	h	h	h	h	h	h	h	h	h	h	h	h	h	h	h	h	h	a	h	h	h	h	h	h	h	h	a	h	h	h	h	h	h	h	h	h	h	h
UC-48	h	h	h	h	h	h	h	a	a	a	a	a	a	a	a	a	a	a	a	a	a	a	a	a	a	a	a	a	a	a	a	a	a	a	a	a	a	a	a	a	a	a	a	a	h	a	a	a	a
UC-490	h	h	h	h	h	a	h	a	a	a	a	a	a	a	a	a	a	a	a	a	a	a	a	a	a	a	a	a	a	a	a	a	a	a	a	a	a	a	a	a	a	a	a	a	a	a	a	a	a
UC-491	h	h	h	h	h	h	h	h	h	h	h	h	h	h	h	h	h	h	h	h	h	h	h	h	h	h	h	h	h	h	h	h	h	h	h	h	h	h	h	h	h	h	h	h	h	h	h	h	h
UC-493	a	a	a	a	a	a	a	a	a	a	a	a	a	a	a	a	a	h	a	a	a	a	h	a	a	a	a	a	a	h	a	a	a	a	a	a	a	a	a	a	a	a	a	a	a	a	a	a	a
UC-495	a	a	h	a	a	a	a	a	a	h	b	b	b	h	h	h	b	h	h	h	b	b	b	h	h	b	h	b	h	b	h	h	h	h	h	h	h	h	h	h	h	h	h	h	h	h	h	h	h
UC-497	a	a	a	a	a	a	a	a	h	h	h	h	h	h	a	h	h	h	h	h	h	h	a	h	h	h	h	h	h	h	h	h	h	h	h	h	h	h	h	h	h	h	h	h	h	h	h	h	h
UC-49	h	h	h	h	h	h	h	h	h	h	h	h	h	h	h	h	h	h	h	h	h	h	h	h	h	h	h	h	h	h	h	h	h	h	h	h	h	h	h	h	h	h	h	h	h	h	h	h	h
UC-4	b	b	b	b	h	h	h	h	h	h	a	h	h	h	h	-	a	h	h	h	a	a	a	h	h	h	b	a	h	h	h	h	h	h	h	b	h	h	h	b	h	h	h	h	h	h	h	b	h
UC-500	a	a	a	a	a	a	a	a	a	a	a	a	a	a	a	a	a	a	a	a	a	a	a	a	a	a	a	a	a	a	a	a	a	a	a	a	a	a	a	a	a	a	a	a	a	a	h	a	a
UC-507	a	a	a	a	a	a	a	a	a	a	a	a	a	a	a	a	a	a	a	a	a	a	a	a	a	a	a	a	a	a	a	a	a	a	a	a	a	a	a	a	a	a	a	a	a	a	a	a	a
UC-508	h	h	h	h	h	b	b	b	b	b	b	b	b	h	b	b	b	b	b	b	b	b	b	b	b	b	b	b	b	h	b	b	b	h	b	b	b	b	b	h	b	b	b	b	b	b	h	b	b
UC-509	h	h	h	h	h	h	h	h	h	h	b	b	b	b	b	b	b	b	b	b	b	b	b	b	b	b	b	b	b	b	b	b	b	b	b	b	b	b	b	b	b	b	b	b	b	b	b	b	b
UC-50	a	a	a	a	h	b	h	b	h	b	a	a	h	h	b	h	h	h	h	h	h	-	h	a	h	b	h	h	b	a	h	h	b	b	h	h	h	h	a	h	h	a	h	h	b	h	h	a	b
UC-510	h	h	h	h	a	a	a	a	a	a	b	a	a	a	a	a	b	a	a	a	b	a	b	a	a	a	a	a	a	a	a	a	a	a	a	a	a	a	a	h	h	a	a	a	a	a	a	a	a
UC-511	h	h	h	h	b	h	h	h	h	h	h	h	h	h	h	a	h	h	-	h	h	h	h	h	h	h	h	h	h	h	h	h	h	h	h	h	a	h	h	h	h	h	h	h	h	h	h	h	h
UC-512	h	h	h	h	h	h	h	h	h	h	a	a	a	a	a	a	a	a	a	a	a	a	a	a	a	a	a	a	a	a	a	a	a	h	a	a	a	a	a	a	a	a	a	a	a	a	a	a	a
UC-513	a	a	a	a	a	a	a	a	a	a	h	a	a	a	a	a	h	a	a	a	h	h	h	a	a	a	a	h	a	a	a	a	h	a	a	a	a	a	a	a	a	a	a	a	a	a	a	a	a
UC-514	b	b	b	b	h	h	h	h	h	h	h	h	h	h	a	h	h	h	h	h	h	h	h	h	h	h	h	h	h	h	h	h	h	h	h	h	h	h	h	h	h	h	h	h	h	h	h	h	h
UC-518	h	h	h	h	h	h	b	b	b	b	b	b	b	b	b	b	b	b	b	b	b	b	b	b	b	b	b	b	b	h	b	b	b	b	b	b	b	b	b	b	b	b	b	b	b	b	b	b	b
UC-51	b	b	b	b	b	b	b	b	b	b	b	h	b	b	b	b	b	b	b	b	b	b	b	b	b	b	b	b	b	b	b	b	b	b	b	b	b	b	b	b	b	b	b	b	b	b	b	b	b
UC-522	h	h	h	h	h	h	h	h	h	h	h	h	h	h	h	h	h	h	h	h	h	h	h	h	h	h	h	h	h	h	h	h	h	h	h	h	h	h	h	h	h	h	h	h	h	h	h	h	h
UC-525	h	h	h	h	h	h	h	a	a	a	h	h	h	h	h	h	h	h	h	h	h	h	h	h	h	h	h	h	h	h	h	h	h	h	h	h	h	h	h	h	h	h	h	h	h	h	h	h	h
UC-526	h	h	h	h	h	h	h	-	b	b	b	b	b	b	b	b	b	h	b	h	b	b	b	b	b	b	b	b	b	b	b	b	b	b	b	b	b	b	b	b	b	b	b	b	b	b	b	b	b
UC-527	h	h	h	h	h	h	h	h	h	h	h	h	h	h	h	h	h	h	h	a	h	h	h	h	a	h	h	h	h	h	h	h	h	h	h	h	h	h	h	h	h	h	h	h	h	h	h	h	h
UC-529	b	b	b	b	h	h	h	h	h	h	h	h	h	a	h	h	h	h	b	h	h	h	h	h	h	h	h	h	h	h	h	h	h	h	h	h	h	h	h	h	h	h	h	h	h	h	h	h	h
UC-52	b	b	b	b	b	b	b	h	b	b	h	h	b	b	h	h	h	h	h	h	h	h	h	h	h	b	h	h	h	h	h	h	h	h	h	h	h	h	a	h	h	h	h	h	h	h	h	h	h
UC-533	h	h	h	h	a	b	h	a	h	h	b	h	h	h	a	h	h	h	h	h	h	h	h	h	h	h	h	h	h	h	b	h	h	h	h	h	h	h	h	h	h	h	h	h	h	h	b	h	h
UC-537	h	h	h	h	h	h	h	h	h	h	b	b	b	b	b	b	b	b	b	b	b	b	b	b	b	h	h	b	b	b	b	b	b	b	b	b	b	b	b	b	b	b	b	b	b	b	b	b	b
UC-53	a	a	a	a	h	a	a	a	a	h	h	h	h	h	h	h	h	h	h	h	h	h	h	h	a	h	h	h	h	h	h	h	h	h	h	h	h	h	h	h	h	h	h	h	h	h	h	h	h
UC-54	h	h	h	h	b	h	h	h	h	h	-	h	b	h	h	h	h	h	h	h	h	h	h	h	h	h	a	h	h	h	h	h	h	h	h	h	h	b	h	a	a	h	b	h	b	h	h	h	h
UC-56	h	h	h	b	h	b	h	-	h	h	b	b	b	b	b	b	b	b	b	b	h	b	b	b	b	b	b	b	b	b	b	b	b	b	b	b	h	b	b	b	b	b	b	b	b	b	b	b	b
UC-57	h	a	h	h	h	h	h	h	h	h	h	h	h	h	h	h	h	h	h	h	h	h	h	h	h	h	h	h	h	a	h	h	h	h	h	h	h	h	h	h	h	h	h	h	a	h	h	h	h
UC-58	h	h	h	h	h	h	h	h	h	h	b	b	b	b	b	b	b	b	b	b	b	b	b	b	b	b	b	b	b	b	b	b	b	b	b	b	b	b	b	b	b	b	b	b	b	b	b	b	b
UC-59	h	a	h	b	b	-	a	-	h	h	b	b	b	b	b	b	b	b	b	b	b	b	b	b	b	b	-	b	b	-	b	b	b	b	b	b	b	b	b	b	b	b	b	b	b	b	b	b	b
UC-5	a	a	a	h	a	a	a	a	h	h	h	h	h	h	h	h	h	a	a	a	h	h	h	h	b	b	h	h	h	h	h	h	h	h	h	h	h	h	h	h	h	h	h	h	h	b	h	h	h
UC-60	h	h	h	h	h	a	a	a	a	a	a	a	a	a	a	a	a	a	a	a	a	a	a	a	a	a	a	a	a	a	a	a	a	a	a	a	a	a	a	a	a	a	a	a	a	a	a	a	a
UC-61	h	h	h	h	b	h	a	a	h	h	h	h	h	h	h	h	h	h	h	h	h	h	h	h	h	h	h	h	h	h	h	b	h	h	h	h	h	h	h	h	h	h	h	h	h	h	h	h	h
UC-62	b	b	b	h	b	b	b	b	b	b	h	b	h	b	b	b	b	b	b	b	b	b	b	b	b	b	b	b	b	b	b	b	b	b	b	b	b	b	b	b	b	b	b	b	b	b	b	b	b
UC-63	h	h	b	a	h	b	h	h	h	h	h	h	h	a	h	b	h	h	h	h	a	a	h	h	a	h	a	h	h	a	h	h	h	b	b	h	h	b	h	h	h	b	b	h	h	h	h	h	h
UC-64	a	a	a	a	a	a	a	a	a	a	a	a	a	a	a	a	a	a	a	a	a	a	a	a	a	a	a	a	a	a	a	a	a	a	a	a	a	a	a	a	a	a	a	a	a	a	a	a	a
UC-65	a	a	a	a	a	h	a	a	a	a	h	a	a	a	h	a	h	a	a	a	h	h	h	a	a	a	a	h	a	a	a	a	a	a	h	h	h	h	h	a	a	a	a	a	h	b	h	h	h
UC-66	b	b	b	b	b	b	b	b	b	b	b	b	b	b	b	b	b	b	b	b	b	b	b	b	b	b	b	b	b	b	b	b	b	b	b	b	b	b	b	b	b	b	b	b	h	b	b	b	b
UC-67	a	h	h	h	h	h	b	a	h	h	b	-	b	b	b	b	b	b	b	b	b	b	b	b	b	b	b	b	-	b	b	b	b	b	b	b	b	b	b	b	b	b	b	b	b	b	b	b	b
UC-68	b	b	b	b	b	b	b	h	b	b	b	b	h	b	b	b	b	b	b	b	b	b	b	b	b	b	b	b	b	b	b	b	b	b	b	b	b	b	b	b	b	b	b	b	b	b	b	b	-
UC-69	a	a	a	a	a	a	a	a	a	a	a	a	a	a	a	a	a	a	h	a	a	a	a	a	a	a	a	a	a	a	a	a	a	a	a	a	a	a	a	a	a	a	a	a	a	a	a	a	a
UC-6	b	b	b	b	b	b	b	b	b	b	b	b	b	b	b	b	b	b	b	b	b	b	b	b	b	b	b	b	b	b	b	b	b	b	b	b	b	b	b	b	b	b	b	b	b	h	b	b	b
UC-70	a	a	a	a	h	h	h	h	h	h	b	b	b	b	b	b	b	b	b	b	b	b	b	b	b	b	b	b	b	b	b	b	b	b	b	b	b	b	b	b	b	b	b	b	b	b	b	b	b
UC-71	a	a	a	a	a	a	a	a	a	h	h	a	a	a	a	a	h	a	a	a	h	h	h	a	a	a	a	h	a	a	a	a	a	a	a	a	a	a	a	a	a	a	a	a	a	a	a	a	a
UC-72	h	h	h	h	h	h	h	b	b	b	h	h	h	h	h	h	h	a	h	h	h	h	h	h	h	h	h	h	h	h	h	h	h	h	h	h	h	h	h	h	h	h	h	h	h	h	h	h	h
UC-73	h	h	h	h	h	h	h	-	h	b	b	b	b	b	b	-	-	b	b	h	b	b	b	b	b	-	b	b	b	b	b	b	b	b	b	b	b	b	b	b	b	b	b	b	b	b	b	b	b
UC-74	h	h	h	h	h	h	h	h	h	h	h	a	a	a	a	a	h	a	a	a	h	h	h	a	a	a	a	h	a	a	a	a	a	a	a	a	a	a	a	a	a	a	a	a	a	a	a	a	a
UC-75	b	b	b	b	b	b	b	h	h	h	a	a	h	a	a	a	a	h	a	a	a	a	a	a	h	a	a	a	-	a	a	a	a	a	h	a	a	a	a	h	h	a	a	a	a	a	a	h	a
UC-76	a	a	a	a	a	a	a	a	a	a	a	h	a	-	a	a	a	a	a	a	a	a	a	a	a	a	h	a	-	a	a	a	a	a	a	a	a	h	a	a	a	a	a	a	a	a	a	a	a
UC-77	a	a	a	a	a	a	a	a	a	a	-	a	a	a	h	h	h	h	h	a	h	h	h	h	h	a	h	h	h	h	h	h	h	h	b	h	h	h	h	h	h	h	b	h	h	h	h	h	h
UC-78	h	h	h	h	h	h	h	a	a	a	h	a	a	a	a	a	a	a	a	a	a	a	a	a	a	a	a	a	a	a	a	a	a	a	a	a	a	a	a	a	a	a	a	a	a	a	a	a	a
UC-79	a	a	a	a	a	a	a	a	a	a	a	a	a	a	a	h	a	a	h	a	a	a	a	a	a	a	a	a	a	a	a	a	a	a	a	a	a	a	a	a	a	a	a	a	a	a	a	a	a
UC-7	a	h	h	h	b	h	b	h	b	b	h	h	h	a	h	a	h	h	h	a	h	h	h	b	a	h	h	a	h	h	h	h	h	h	h	h	h	h	a	h	h	h	h	h	a	h	a	h	h
UC-80	a	a	a	a	a	a	a	-	h	a	h	a	a	a	a	a	a	a	a	a	a	h	a	a	a	a	a	a	-	a	a	a	a	a	a	a	a	a	a	a	a	a	a	a	a	a	h	a	a
UC-82	b	b	b	b	b	b	b	b	b	b	b	b	b	b	b	b	b	h	b	b	b	b	b	b	b	b	b	b	b	b	h	b	b	b	b	-	b	b	b	b	b	b	b	b	b	b	b	b	b
UC-84	b	b	h	h	h	h	h	a	b	h	a	a	a	a	a	a	a	h	a	a	a	a	h	a	a	a	h	a	a	a	a	a	a	a	a	a	a	-	a	a	a	a	h	h	a	a	a	a	a
UC-85	h	h	h	b	h	b	h	a	b	h	h	h	h	h	b	h	h	b	h	h	h	h	b	h	h	h	h	h	h	h	h	b	h	h	h	h	h	h	h	h	h	b	b	h	h	a	a	h	h
UC-86	b	b	b	b	h	h	h	h	h	h	h	h	h	h	h	h	h	h	h	h	h	h	a	h	h	h	h	h	h	h	h	h	h	h	h	h	h	h	h	h	h	h	h	h	h	h	h	h	h
UC-88	h	h	h	h	h	h	h	h	h	h	b	h	h	h	b	h	h	h	h	-	b	h	h	a	h	h	h	h	h	a	b	-	a	h	a	b	h	h	h	h	h	h	h	h	h	h	h	h	b
UC-89	b	b	b	h	b	b	b	h	h	h	h	b	h	h	h	h	h	h	h	h	h	h	h	h	h	h	h	h	h	h	h	h	h	h	h	b	h	h	h	h	h	h	h	h	h	h	h	h	h
UC-8	a	a	a	a	h	a	a	a	a	a	a	h	h	h	h	b	h	h	h	h	h	h	b	h	h	h	h	b	h	h	h	b	h	h	a	h	h	h	h	h	h	h	h	a	h	b	h	h	h
UC-90	h	h	h	h	h	h	h	h	h	h	h	h	h	h	h	h	h	a	h	h	h	h	h	h	h	h	-	a	h	h	b	h	h	h	h	h	-	h	b	b	b	h	h	a	h	h	h	h	h
UC-91	h	h	h	h	h	h	h	h	h	h	h	h	h	h	h	h	h	h	h	h	h	h	h	h	h	h	h	h	h	h	h	h	h	h	h	h	h	h	h	h	h	h	h	h	h	b	h	h	h
UC-92	h	h	h	h	h	a	a	h	a	a	a	a	h	a	a	a	a	-	h	h	a	a	a	a	a	a	a	a	a	a	a	a	a	a	-	a	a	a	a	a	a	a	a	h	a	h	a	a	a
UC-95	h	h	h	h	h	h	h	h	h	h	a	a	a	a	h	a	a	a	a	a	a	a	h	a	a	a	a	a	a	a	a	a	a	a	a	a	a	a	a	a	a	a	a	a	a	a	a	a	a
UC-96	h	b	h	h	b	b	a	b	h	h	h	h	b	b	-	b	h	h	h	h	a	h	h	h	h	h	h	h	h	h	h	h	h	h	h	h	h	h	h	h	h	h	h	h	h	h	a	a	h
UC-97	b	b	b	b	b	b	b	-	b	b	h	h	h	h	a	h	h	h	h	h	h	h	h	h	h	h	h	h	h	h	h	h	h	h	h	h	h	h	h	h	h	h	h	h	h	h	h	h	h
UC-98	h	h	b	h	b	h	h	a	h	h	h	h	h	h	a	h	-	h	h	a	h	h	h	h	h	h	h	h	h	b	h	h	h	h	h	h	h	h	a	h	h	b	h	h	h	h	h	h	h
UC-99	h	b	h	h	h	h	h	h	h	h	h	b	b	b	b	b	h	b	b	b	h	h	a	h	b	b	b	h	b	b	b	b	b	b	b	b	b	b	b	b	b	b	b	b	b	b	b	b	b
UC-9	b	b	b	b	b	b	b	b	b	b	h	b	b	h	-	b	b	b	b	b	b	b	b	b	b	b	b	b	b	b	b	b	b	b	b	b	b	b	b	b	b	b	b	b	b	b	b	b	b
[truncated: 1,768 more columns]
